# Supplementary material for: Optimization of a Calcium-Based Treatment Method for Jellyfish to Design Food for the Future
Source: MDPI journal article supplement (doi:10.3390/foods11172697), 2022-09-04
Supplement: s1 [file s1]

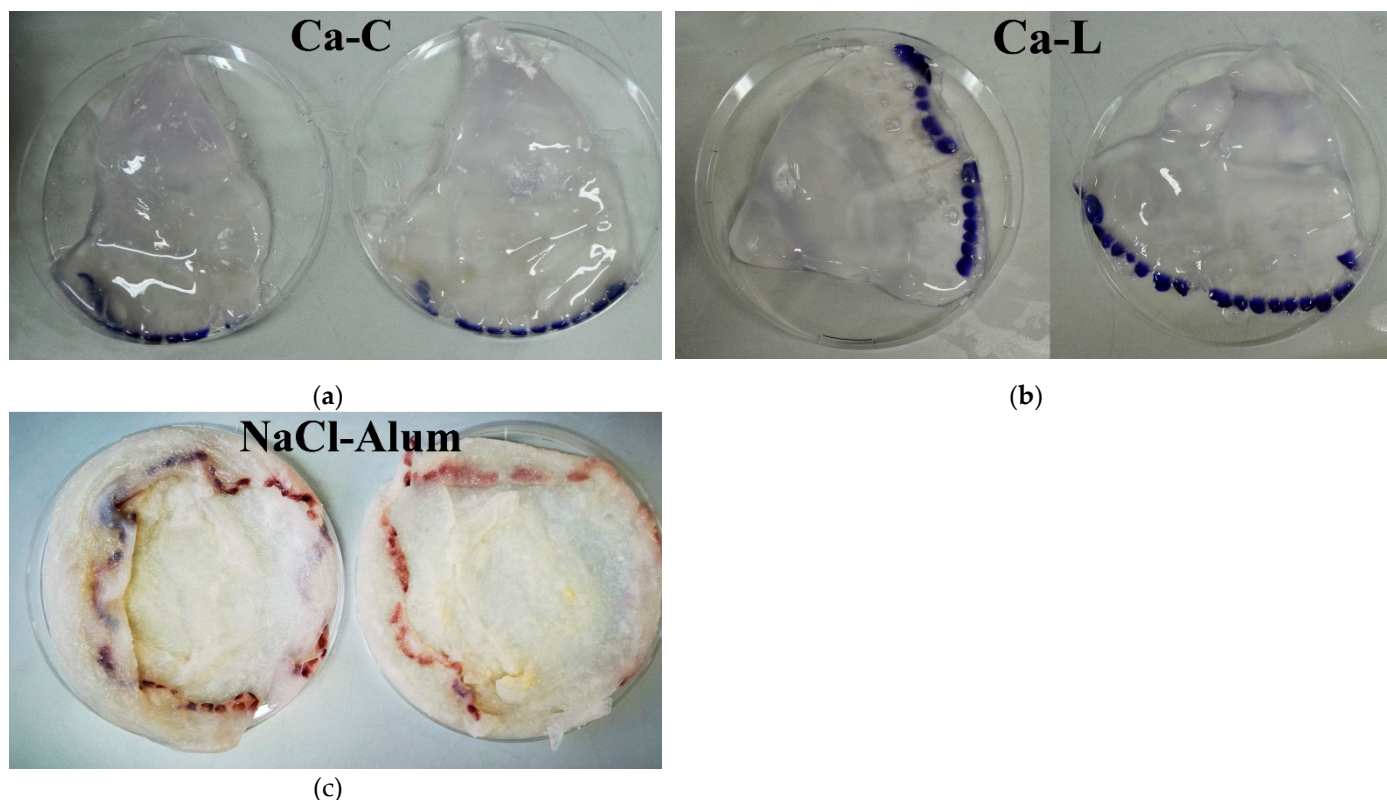

**Figure S1.** *Rhizostoma pulmo* jellyfish products obtained by the new proposed method. Ca-C: *R. pulmo* jellyfish after treatment in calcium citrate brine (a); Ca-L: *R. pulmo* jellyfish after treatment in calcium lactate brine (b); NaCl-Alum: *R. pulmo* jellyfish obtained by salt-alum traditional method (c).

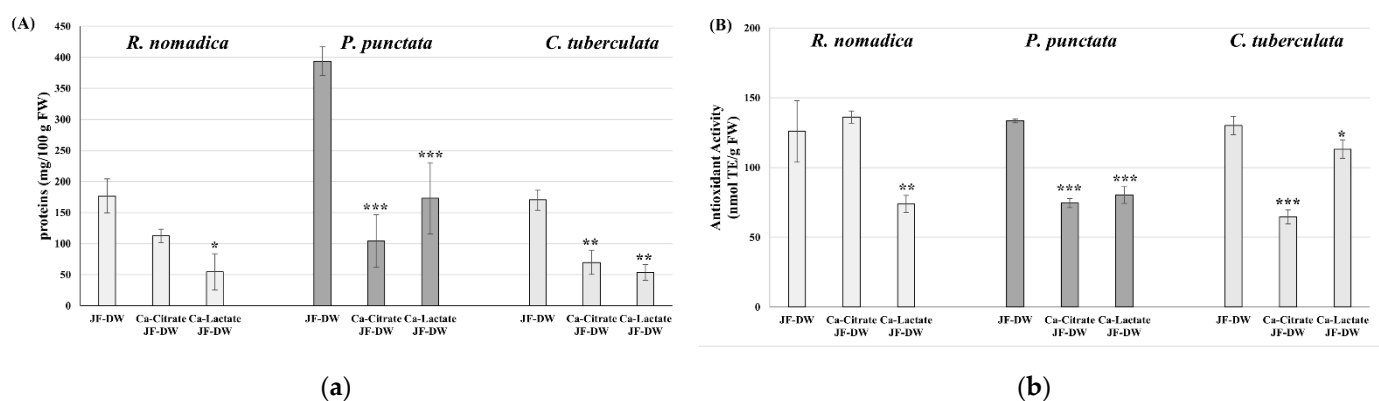

**Figure S2.** Proteins content (a) and Antioxidant activity (b) in *Cotylorhiza tuberculata*, *Rhopilema nomadica* and *Phyllorhiza punctata* JF-DW samples and the corresponding calcium salt treated samples (Ca-Lactate JF-DW and Ca-Citrate JF-DW). Protein contents were expressed as mg per 100 grams of fresh weight (mg/100 g FW) and antioxidant activity was expressed as nmol TE per gram of FW (nmol TE/g FW). Values are the means of three independent measurements,  $\pm$  standard deviation. ANOVA statistic test followed by Bonferroni's multiple comparison post-hoc test was used to compare each treatment with the others for each JF species.

**Table S1.** Microbiological analyses of JF-DW (JF transported on lab and pre-treated with drinking water) untreated and treated with brines containing different calcium salts at 5 days treatment at 4 °C (Ca-Citrate: calcium citrate; Ca-Lactate: calcium lactate). The different letters in line indicate significant differences between samples ( $p < 0.05$ )

| Microorganisms                      | Medium            | JF-DW        |      |                        |      |                        |                    |
|-------------------------------------|-------------------|--------------|------|------------------------|------|------------------------|--------------------|
|                                     |                   | Untreated    |      | Ca-Citrate             |      | Ca-Lactate             |                    |
|                                     |                   | Mean (CFU/g) | SD   | Mean (CFU/g)           | SD   | Mean (CFU/g)           | SD                 |
| TBC                                 | PCA               | 0 (a)        | 0    | $8.75 \times 10^1$ (b) | 3.54 | $2.90 \times 10^2$ (c) | $5.66 \times 10^1$ |
| <i>Bacillus</i> spp.                | BCSA              | 3.00 (a)     | 1.05 | 0 (b)                  | 0    | 0 (b)                  | 0                  |
| H <sub>2</sub> S-producing bacteria | IRON AGAR         | 0            | 0    | 0                      | 0    | 0                      | 0                  |
| Enterobacteriaceae                  | VRBGA             | 0            | 0    | 0                      | 0    | 0                      | 0                  |
| <i>Coli-Aerogenes</i> Bacteria      | VRBA              | 0            | 0    | 0                      | 0    | 0                      | 0                  |
| Coagulase positive staphylococci    | Baird Parker Agar | 0            | 0    | 0                      | 0    | 0                      | 0                  |
| Pathogenic staphylococci            | MSA               | 0            | 0    | 0                      | 0    | 0                      | 0                  |
| <i>Pseudomonas</i> spp.             | Pseudomonas Agar  | 0            | 0    | 0                      | 0    | 0                      | 0                  |
| <i>Vibrio</i> spp.                  | TCBSA             | 0            | 0    | 0                      | 0    | 0                      | 0                  |
| Yeasts                              | DRBC              | 0            | 0    | 0                      | 0    | 0                      | 0                  |
| Moulds                              |                   | 0            | 0    | 0                      | 0    | 0                      | 0                  |
| Halophilic Bacteria                 | R2A               | 0 (a)        | 0    | $1.15 \times 10^1$ (a) | 2.12 | $6.75 \times 10^1$ (b) | 3.54               |
|                                     | Marine Agar       | 0            | 0    | 0                      | 0    | 0                      | 0                  |
| Halophilic Yeasts                   | sCMA              | 0            | 0    | 0                      | 0    | 0                      | 0                  |
|                                     | sSDA              | 0            | 0    | 0                      | 0    | 0                      | 0                  |
|                                     | R2A               | 0            | 0    | 0                      | 0    | 0                      | 0                  |
|                                     | Marine Agar       | 0            | 0    | 0                      | 0    | 0                      | 0                  |
| Halophilic Moulds                   | sCMA              | 0            | 0    | 0                      | 0    | 0                      | 0                  |
|                                     | sSDA              | 0            | 0    | 0                      | 0    | 0                      | 0                  |
|                                     | R2A               | 0            | 0    | 0                      | 0    | 0                      | 0                  |
|                                     | Marine Agar       | 0            | 0    | 0                      | 0    | 0                      | 0                  |

TBC: total bacterial count at 30 °C; sCMA: saline Corn Meal Agar; sSDA: saline Sabouraud Dextrose Agar

**Table S2.** Microbiological analyses of JF-B (JF directly pre-treated on boat) untreated and treated with brines containing different calcium salts at 5 days treatment at 4 °C (Ca-Citrate: calcium citrate; Ca-Lactate: calcium lactate). The different letters in line indicate significant differences between samples ( $p < 0.05$ )

| Microorganisms                      | Medium            | JF-B                   |      |              |      |                        |                       |
|-------------------------------------|-------------------|------------------------|------|--------------|------|------------------------|-----------------------|
|                                     |                   | Untreated              |      | Ca-Citrate   |      | Ca-Lactate             |                       |
|                                     |                   | Mean (CFU/g)           | SD   | Mean (CFU/g) | SD   | Mean (CFU/g)           | SD                    |
| TBC                                 | PCA               | $4.60 \times 10^1$ (a) | 4.58 | $7.50$ (b)   | 2.12 | $6.40 \times 10^1$ (a) | $1.98 \times 10^1$    |
| <i>Bacillus</i> spp.                | BCSA              | $2.40 \times 10^1$ (a) | 5.66 | 0 (b)        | 0    | $1.35 \times 10^1$ (a) | 2.12                  |
| H <sub>2</sub> S-producing bacteria | IRON AGAR         | 0                      | 0    | 0            | 0    | 0                      | 0                     |
| Enterobacteriaceae                  | VRBGA             | 0 (a)                  | 0    | 0 (a)        | 0    | $1.45 \times 10^1$ (b) | $8.15 \times 10^{-1}$ |
| <i>Coli-Aerogenes</i> Bacteria      | VRBA              | 0                      | 0    | 0            | 0    | 0                      | 0                     |
| Coagulase positive staphylococci    | Baird Parker Agar | 0                      | 0    | 0            | 0    | 0                      | 0                     |

|                          |                  |                            |                        |       |   |                            |                        |
|--------------------------|------------------|----------------------------|------------------------|-------|---|----------------------------|------------------------|
| Pathogenic staphylococci | MSA              | 0                          | 0                      | 0     | 0 | 0                          | 0                      |
| <i>Pseudomonas</i> spp.  | Pseudomonas Agar | 3.50 (a)                   | 5.08 x 10 <sup>1</sup> | 0 (b) | 0 | 0 (b)                      | 0                      |
| <i>Vibrio</i> spp.       | TCBSA            | 0                          | 0                      | 0     | 0 | 0                          | 0                      |
| Yeasts                   | DRBC             | 0                          | 0                      | 0     | 0 | 0                          | 0                      |
| Moulds                   |                  | 0                          | 0                      | 0     | 0 | 0                          | 0                      |
| Halophilic Bacteria      | R2A              | 7.60 x 10 <sup>1</sup> (a) | 7.16                   | 0 (b) | 0 | 0 (b)                      | 0                      |
|                          | Marin Agar       | 0                          | 0                      | 0     | 0 | 0                          | 0                      |
| Halophilic Yeasts        | sCMA             | 0                          | 0                      | 0     | 0 | 0                          | 0                      |
|                          | sSDA             | 0                          | 0                      | 0     | 0 | 0                          | 0                      |
|                          | R2A              | 0 (a)                      | 0                      | 0 (a) | 0 | 2.75 x 10 <sup>1</sup> (b) | 1.06 x 10 <sup>1</sup> |
|                          | Marine Agar      | 0                          | 0                      | 0     | 0 | 0                          | 0                      |
| Halophilic Moulds        | sCMA             | 0                          | 0                      | 0     | 0 | 0                          | 0                      |
|                          | sSDA             | 0                          | 0                      | 0     | 0 | 0                          | 0                      |
|                          | R2A              | 0                          | 0                      | 0     | 0 | 0                          | 0                      |
|                          | Marine Agar      | 0                          | 0                      | 0     | 0 | 0                          | 0                      |

TBC: total bacterial count at 30 °C; sCMA: saline Corn Meal Agar; sSDA: saline Sabouraud Dextrose Agar

**Table S3.** Microbiological analyses of *Rhizostoma pulmo* JF sample washed in drinking water and then treated with NaCl-alum (Salt-Alum JF-DW). This sample was obtained after 20 days at 4 °C and 2 days air drying (as described in Material and Methods section).

| Microorganisms                      | Medium            | Mean (CFU/g)          | SD                   |
|-------------------------------------|-------------------|-----------------------|----------------------|
| TBC                                 | PCA               | 5.80x 10 <sup>1</sup> | 3.11x10 <sup>1</sup> |
| <i>Bacillus</i> spp.                | BCSA              | 4.15x10 <sup>1</sup>  | 1.20x10 <sup>1</sup> |
| H <sub>2</sub> S-producing bacteria | IRON AGAR         | 0                     | 0                    |
| Enterobacteriaceae                  | VRBGA             | 0                     | 0                    |
| <i>Coli-Aerogenes</i> Bacteria      | VRBA              | 0                     | 0                    |
| Coagulase positive staphylococci    | Baird Parker Agar | 0                     | 0                    |
| Pathogenic staphylococci            | MSA               | 0                     | 0                    |
| <i>Pseudomonas</i> spp.             | Pseudomonas Agar  | 0                     | 0                    |
| <i>Vibrio</i> spp.                  | TCBSA             | 0                     | 0                    |
| Yeasts                              | DRBC              | 1.30x10 <sup>2</sup>  | 1.41x10 <sup>1</sup> |
| Moulds                              |                   | 0                     | 0                    |
| Halophilic Bacteria                 | R2A               | 9.88x10 <sup>2</sup>  | 2.23x10 <sup>2</sup> |
|                                     | Marine Agar       | 4.43x10 <sup>2</sup>  | 2.49x10 <sup>2</sup> |
| Halophilic Yeasts                   | sCMA              | 2.22x10 <sup>2</sup>  | 8.20x10 <sup>1</sup> |
|                                     | sSDA              | 5.00x10 <sup>2</sup>  | 4.24x10 <sup>2</sup> |
|                                     | R2A               | 1.16x10 <sup>3</sup>  | 6.22x10 <sup>2</sup> |
|                                     | Marine Agar       | 9.00x10 <sup>2</sup>  | 4.24x10 <sup>2</sup> |
| Halophilic Moulds                   | sCMA              | 0                     | 0                    |
|                                     | sSDA              | 0                     | 0                    |
|                                     | R2A               | 0                     | 0                    |
|                                     | Marine Agar       | 0                     | 0                    |

TBC: total bacterial count at 30° C; sCMA: saline Corn Meal Agar; sSDA: saline Sabouraud Dextrose Agar

**Table S4.** Amino acid composition of *Rhizostoma pulmo* JF fresh and untreated (Untreated JF), washed in drinking water (JF-DW), and treated with calcium citrate (Ca-Citrate JF-DW) and calcium lactate (Ca-Lactate JF-DW). Data are mean  $\pm$  Standard deviation ( $\pm$  SD) of four independent analyses. AA. amino acids; Nd. Not detected.

| <i>Rhizostoma pulmo</i> samples |                                     |                        |                                     |                        |                                     |                        |                                     |                        |
|---------------------------------|-------------------------------------|------------------------|-------------------------------------|------------------------|-------------------------------------|------------------------|-------------------------------------|------------------------|
| Amino acids                     | Untreated JF                        |                        | JF-DW                               |                        | Ca-Citrate JF-DW                    |                        | Ca-Lactate JF-DW                    |                        |
|                                 | Percentage per dry weight (% of dw) | Percentage of total AA | Percentage per dry weight (% of dw) | Percentage of total AA | Percentage per dry weight (% of dw) | Percentage of total AA | Percentage per dry weight (% of dw) | Percentage of total AA |
|                                 | Average $\pm$ SD                    | (%)                    |
| Taurin                          | 0.3 $\pm$ 0.1                       | 5.4                    | 0.1 $\pm$ 0.1                       | 0.6                    | 0.1 $\pm$ 0.1                       | 0.9                    | 0.2 $\pm$ 0.1                       | 1.2                    |
| Methionine sulfoxide            | n.d.                                | -                      | n.d.                                | -                      | n.d.                                | -                      | n.d.                                | -                      |
| Hydroxyproline                  | 0.0                                 | -                      | 0.1 $\pm$ 0.1                       | 1.2                    | 0.2 $\pm$ 0.2                       | 1.3                    | 0.2 $\pm$ 0.2                       | 1.1                    |
| Aspartic acid + Asparagine      | 0.4 $\pm$ 0.1                       | 5.9                    | 0.6 $\pm$ 0.2                       | 6.8                    | 1.0 $\pm$ 0.1                       | 6.7                    | 1.0 $\pm$ 0.2                       | 6.5                    |
| Threonine                       | 0.2 $\pm$ 0.0                       | 3.6                    | 0.3 $\pm$ 0.1                       | 3.4                    | 0.6 $\pm$ 0.0                       | 4.2                    | 0.7 $\pm$ 0.1                       | 4.7                    |
| Serine                          | 0.3 $\pm$ 0.0                       | 5.3                    | 0.5 $\pm$ 0.1                       | 5.0                    | 0.9 $\pm$ 0.2                       | 6.0                    | 0.8 $\pm$ 0.2                       | 5.6                    |
| Glutamic acid + Glutamine       | 0.6 $\pm$ 0.1                       | 9.9                    | 0.9 $\pm$ 0.3                       | 9.4                    | 1.7 $\pm$ 0.1                       | 11.1                   | 1.6 $\pm$ 0.1                       | 10.4                   |
| Proline                         | 0.2 $\pm$ 0.2                       | 3.0                    | 0.5 $\pm$ 0.3                       | 5.5                    | 1.1 $\pm$ 0.2                       | 7.2                    | 1.1 $\pm$ 0.1                       | 7.4                    |
| Glycine                         | 0.6 $\pm$ 0.0                       | 9.4                    | 1.6 $\pm$ 0.4                       | 17.0                   | 2.4 $\pm$ 0.0                       | 15.5                   | 2.2 $\pm$ 0.1                       | 14.4                   |
| Alanine                         | 0.4 $\pm$ 0.0                       | 7.0                    | 0.8 $\pm$ 0.2                       | 8.5                    | 1.1 $\pm$ 0.2                       | 7.2                    | 1.5 $\pm$ 0.3                       | 9.5                    |
| Cystine (Cys-Cys)               | 0.0 $\pm$ 0.0                       | 0.5                    | n.d.                                | -                      | 0.0 $\pm$ 0.1                       | 0.3                    | 0.1 $\pm$ 0.1                       | 0.4                    |
| Valine                          | 0.3 $\pm$ 0.0                       | 5.0                    | 0.4 $\pm$ 0.1                       | 4.0                    | 0.8 $\pm$ 0.0                       | 5.1                    | 0.8 $\pm$ 0.0                       | 5.3                    |
| Methionine                      | 0.0 $\pm$ 0.0                       | 0.8                    | 0.1 $\pm$ 0.1                       | 0.6                    | 0.2 $\pm$ 0.0                       | 1.3                    | 0.2 $\pm$ 0.0                       | 1.3                    |
| Isoleucine                      | 0.2 $\pm$ 0.0                       | 3.8                    | 0.3 $\pm$ 0.1                       | 3.2                    | 0.5 $\pm$ 0.0                       | 3.3                    | 0.5 $\pm$ 0.0                       | 3.0                    |
| Leucine                         | 0.3 $\pm$ 0.0                       | 5.8                    | 0.4 $\pm$ 0.1                       | 4.5                    | 0.7 $\pm$ 0.0                       | 4.6                    | 0.7 $\pm$ 0.0                       | 4.4                    |
| Tyrosine                        | 0.3 $\pm$ 0.1                       | 5.8                    | 0.3 $\pm$ 0.1                       | 3.7                    | 0.5 $\pm$ 0.1                       | 3.3                    | 0.4 $\pm$ 0.1                       | 2.9                    |
| Phenylalanine                   | 0.4 $\pm$ 0.1                       | 7.4                    | 0.4 $\pm$ 0.1                       | 4.8                    | 0.7 $\pm$ 0.1                       | 4.5                    | 0.7 $\pm$ 0.2                       | 4.5                    |
| Histidine                       | 0.2 $\pm$ 0.0                       | 2.9                    | 0.3 $\pm$ 0.1                       | 3.5                    | 0.4 $\pm$ 0.0                       | 2.9                    | 0.5 $\pm$ 0.1                       | 2.9                    |
| Hydroxylysine                   | n.d.                                | -                      | n.d.                                | -                      | n.d.                                | -                      | n.d.                                | -                      |
| Lysine                          | 0.4 $\pm$ 0.0                       | 7.3                    | 0.5 $\pm$ 0.1                       | 5.5                    | 0.8 $\pm$ 0.0                       | 5.1                    | 0.8 $\pm$ 0.0                       | 5.1                    |
| Tryptophan                      | n.d.                                | -                      | n.d.                                | -                      | n.d.                                | -                      | n.d.                                | -                      |

---

|                      |           |       |           |       |            |       |            |       |
|----------------------|-----------|-------|-----------|-------|------------|-------|------------|-------|
| Arginine             | 0.7 ± 0.2 | 11.1  | 1.2 ± 0.4 | 12.7  | 1.5 ± 0.4  | 9.8   | 1.4 ± 0.3  | 9.2   |
| Ammonia              | 0.1 ± 0.0 | 1.7   | 0.1 ± 0.0 | 1.5   | 0.2 ± 0.0  | 1.6   | 0.2 ± 0.0  | 1.5   |
| Total (AA only)      | 6.0 ± 0.1 | 100.0 | 9.2 ± 2.1 | 100.0 | 15.4 ± 0.7 | 100.0 | 15.3 ± 0.8 | 100.0 |
| Total (AA + ammonia) | 6.1 ± 0.1 |       | 9.3 ± 2.1 |       | 15.7 ± 0.7 |       | 15.5 ± 0.8 |       |

**Table S5.** Microbiological analyses of *Cotylorhiza tuberculata* JF sample washed with drinking water (JF-DW) and treated with brines containing calcium salts (Ca-Citrate: calcium citrate; Ca-Lactate: calcium lactate). The different letters in line indicate significant differences between samples (p < 0.05)

| <i>Cotylorhiza tuberculata</i>      |                   |              |    |                           |      |                           |                       |
|-------------------------------------|-------------------|--------------|----|---------------------------|------|---------------------------|-----------------------|
| Microorganisms                      | Medium            | JF-DW        |    | Ca-Citrate                |      | Ca-Lactate                |                       |
|                                     |                   | Mean (CFU/g) | SD | Mean (CFU/g)              | SD   | Mean (CFU/g)              | SD                    |
| TBC                                 | PCA               | 0            | 0  | 0                         | 0    | 0                         | 0                     |
| <i>Bacillus</i> spp.                | BCSA              | 0            | 0  | 0                         | 0    | 0                         | 0                     |
| H <sub>2</sub> S-producing bacteria | IRON AGAR         | 0            | 0  | 0                         | 0    | 0                         | 0                     |
| Enterobacteriaceae                  | VRBGA             | 0            | 0  | 0                         | 0    | 0                         | 0                     |
| <i>Coli-Aerogenes</i> Bacteria      | VRBA              | 0            | 0  | 0                         | 0    | 0                         | 0                     |
| Coagulase positive staphylococci    | Baird Parker Agar | 0            | 0  | 0                         | 0    | 0                         | 0                     |
| <i>Pseudomonas</i> spp.             | Pseudomonas Agar  | 0            | 0  | 0                         | 0    | 0                         | 0                     |
| Yeasts                              | DRBC              | 0            | 0  | 0                         | 0    | 0                         | 0                     |
| Moulds                              |                   | 0 (a)        | 0  | 0 (a)                     | 0    | 3.60x10 <sup>1</sup> (b)  | 1.69 x10 <sup>1</sup> |
| Halophilic Bacteria                 | R2A               | 0 (a)        | 0  | 2.80x 10 <sup>1</sup> (b) | 8.48 | 1.60x10 <sup>1</sup> (b)  | 1.13 x10 <sup>1</sup> |
|                                     | Marine Agar       | 0 (a)        | 0  | 1.20 x10 <sup>1</sup> (a) | 2.82 | 3.21 x10 <sup>1</sup> (b) | 1.56 x10 <sup>1</sup> |
| Halophilic Yeasts                   | sCMA              | 0 (a)        | 0  | 0 (a)                     | 0    | 2.53 x10 <sup>1</sup> (b) | 1.75 x10 <sup>1</sup> |
|                                     | sSDA              | 0 (a)        | 0  | 0 (a)                     | 0    | 3.20x 10 <sup>1</sup> (b) | 1.18 x10 <sup>1</sup> |
|                                     | R2A               | 0 (a)        | 0  | 0 (a)                     | 0    | 1.20 x10 <sup>1</sup> (b) | 5.65                  |
|                                     | Marine Agar       | 0            | 0  | 0                         | 0    | 0                         | 0                     |
| Halophilic Moulds                   | sCMA              | 0            | 0  | 0                         | 0    | 0                         | 0                     |
|                                     | sSDA              | 0            | 0  | 0                         | 0    | 0                         | 0                     |
|                                     | R2A               | 0            | 0  | 0                         | 0    | 0                         | 0                     |
|                                     | Marine Agar       | 0            | 0  | 0                         | 0    | 0                         | 0                     |

TBC: total bacterial count at 30°C; sCMA: saline Corn Meal Agar; sSDA: saline Sabouraud Dextrose Agar

**Table S6.** Microbiological analyses of *Rhopilema nomadica* JF sample washed with drinking water (JF-DW) and treated with brines containing calcium salts (Ca-Citrate: calcium citrate; Ca-Lactate: calcium lactate). The different letters in line indicate significant differences between samples ( $p < 0.05$ )

| <i>Rhopilema nomadica</i>           |                   |                            |                        |                            |                        |                            |      |
|-------------------------------------|-------------------|----------------------------|------------------------|----------------------------|------------------------|----------------------------|------|
| Microorganisms                      | Medium            | JF-DW                      |                        | Ca-Citrate                 |                        | Ca-Lactate                 |      |
|                                     |                   | Mean (CFU/g)               | SD                     | Mean (CFU/g)               | SD                     | Mean (CFU/g)               | SD   |
| TBC                                 | PCA               | 4.20 x 10 <sup>1</sup> (a) | 1.27 x 10 <sup>1</sup> | 3.60 x 10 <sup>1</sup> (a) | 5.74                   | 0 (b)                      | 0    |
| <i>Bacillus</i> spp.                | BCSA              | 0 (a)                      | 0                      | 2.40 x 10 <sup>1</sup> (b) | 7.48                   | 0 (a)                      | 0    |
| H <sub>2</sub> S-producing bacteria | IRON AGAR         | 0                          | 0                      | 0                          | 0                      | 0                          | 0    |
| Enterobacteriaceae                  | VRBGA             | 0                          | 0                      | 0                          | 0                      | 0                          | 0    |
| <i>Coli-Aerogenes</i> Bacteria      | VRBA              | 0                          | 0                      | 0                          | 0                      | 0                          | 0    |
| Coagulase positive staphylococci    | Baird Parker Agar | 0                          | 0                      | 0                          | 0                      | 0                          | 0    |
| <i>Pseudomonas</i> spp.             | Pseudomonas Agar  | 0                          | 0                      | 0                          | 0                      | 0                          | 0    |
| Yeasts                              | DRBC              | 0                          | 0                      | 0                          | 0                      | 0                          | 0    |
| Moulds                              |                   | 2.40 x 10 <sup>1</sup> (a) | 6.45                   | 0 (b)                      | 0                      | 0 (b)                      | 0    |
| Halophilic Bacteria                 | R2A               | 0 (a)                      | 0                      | 1.02x 10 <sup>2</sup> (b)  | 1.48 x 10 <sup>1</sup> | 0 (a)                      | 0    |
|                                     | Marine Agar       | 0 (a)                      | 0                      | 7.80 x 10 <sup>1</sup> (b) | 4.24                   | 1.60 x 10 <sup>1</sup> (a) | 7.85 |
| Halophilic Yeasts                   | sCMA              | 0                          | 0                      | 0                          | 0                      | 0                          | 0    |
|                                     | sSDA              | 0                          | 0                      | 0                          | 0                      | 0                          | 0    |
|                                     | R2A               | 7.20 x 10 <sup>1</sup> (a) | 6.52                   | 0 (b)                      | 0                      | 0 (b)                      | 0    |
|                                     | Marine Agar       | 9.60 x 10 <sup>1</sup> (a) | 8.13                   | 2.46 x 10 <sup>1</sup> (b) | 9.13                   | 0 (c)                      | 0    |
|                                     | sCMA              | 0                          | 0                      | 0                          | 0                      | 0                          | 0    |
| Halophilic Moulds                   | sSDA              | 0                          | 0                      | 0                          | 0                      | 0                          | 0    |
|                                     | R2A               | 0                          | 0                      | 0                          | 0                      | 0                          | 0    |
|                                     | Marine Agar       | 0                          | 0                      | 0                          | 0                      | 0                          | 0    |
|                                     | sCMA              | 0                          | 0                      | 0                          | 0                      | 0                          | 0    |

TBC: total bacterial count at 30 °C; sCMA: saline Corn Meal Agar; sSDA: saline Sabouraud Dextrose Agar

**Table S7.** Microbiological analyses of *Phyllorhiza punctata* JF sample washed with drinking water (JF-DW) and treated with brines containing calcium salts (Ca-Citrate: calcium citrate; Ca-Lactate: calcium lactate). The different letters in line indicate significant differences between samples ( $p < 0.05$ )

| <i>Phyllorhiza punctata</i>         |                   |                            |                        |                            |      |                            |                        |
|-------------------------------------|-------------------|----------------------------|------------------------|----------------------------|------|----------------------------|------------------------|
| Microorganisms                      | Medium            | JF-DW                      |                        | Ca-Citrate                 |      | Ca-Lactate                 |                        |
|                                     |                   | Mean<br>(CFU/g)            | SD                     | Mean<br>(CFU/g)            | SD   | Mean<br>(CFU/g)            | SD                     |
| TBC                                 | PCA               | 1.08 x 10 <sup>2</sup> (a) | 8.74                   | 5.10 x 10 <sup>1</sup> (b) | 2.34 | 7.12 x 10 <sup>1</sup> (b) | 1.10 x 10 <sup>1</sup> |
| <i>Bacillus</i> spp.                | BCSA              | 1.20 x 10 <sup>1</sup> (a) | 6.98                   | 1.20 x 10 <sup>1</sup> (a) | 3.61 | 0 (b)                      | 0                      |
| H <sub>2</sub> S-producing bacteria | IRON AGAR         | 1.80 x 10 <sup>1</sup> (a) | 4.26                   | 0 (b)                      | 0    | 0 (b)                      | 0                      |
| Enterobacteriaceae                  | VRBGA             | 0                          | 0                      | 0                          | 0    | 0                          | 0                      |
| <i>Coli-Aerogenes</i> Bacteria      | VRBA              | 0                          | 0                      | 0                          | 0    | 0                          | 0                      |
| Coagulase positive<br>staphylococci | Baird Parker Agar | 0                          | 0                      | 0                          | 0    | 0                          | 0                      |
| <i>Pseudomonas</i> spp.             | Pseudomonas Agar  | 0                          | 0                      | 0                          | 0    | 0                          | 0                      |
| Yeasts                              | DRBC              | 0                          | 0                      | 0                          | 0    | 0                          | 0                      |
| Moulds                              |                   | 0                          | 0                      | 0                          | 0    | 0                          | 0                      |
| Halophilic Bacteria                 | R2A               | 1.68 x 10 <sup>2</sup> (a) | 5.09 x 10 <sup>1</sup> | 1.50 x 10 <sup>1</sup> (b) | 2.12 | 2.46 x 10 <sup>2</sup> (a) | 3.81 x 10 <sup>1</sup> |
|                                     | Marine Agar       | 6.60 x 10 <sup>1</sup> (a) | 4.08                   | 2.70 x 10 <sup>1</sup> (b) | 2.44 | 1.02 x 10 <sup>2</sup> (c) | 1.27 x 10 <sup>1</sup> |
| Halophilic Yeasts                   | sCMA              | 0 (a)                      | 0                      | 9.05 (b)                   | 2.32 | 0 (a)                      | 0                      |
|                                     | sSDA              | 0                          | 0                      | 0                          | 0    | 0                          | 0                      |
|                                     | R2A               | 0                          | 0                      | 0                          | 0    | 0                          | 0                      |
|                                     | Marine Agar       | 0                          | 0                      | 0                          | 0    | 0                          | 0                      |
| Halophilic Moulds                   | sCMA              | 0                          | 0                      | 0                          | 0    | 0                          | 0                      |
|                                     | sSDA              | 0 (a)                      | 0                      | 1.20 x 10 <sup>1</sup> (b) | 4.06 | 0 (a)                      | 0                      |
|                                     | R2A               | 0                          | 0                      | 0                          | 0    | 0                          | 0                      |
|                                     | Marine Agar       | 0 (a)                      | 0                      | 1.50 x 10 <sup>1</sup> (b) | 2.16 | 0 (a)                      | 0                      |

TBC: total bacterial count at 30°C; sCMA: saline Corn Meal Agar; sSDA: saline Sabouraud Dextrose Agar



**Table S8.** Texture, salinity and pH values of *Cotylorhiza tuberculata*, *Rhopilema nomadica* and *Phyllorhiza punctata* JF samples washed with drinking water (JF-DW) and treated with brines containing calcium salts at 5 days treatment (Ca-Citrate: calcium citrate; Ca-Lactate: calcium lactate). The different letters in line indicate significant differences between samples ( $p < 0.05$ )

|                       | Texture (N)   |               |               | Salinity (% NaCl) |            |             | pH    |            |             |
|-----------------------|---------------|---------------|---------------|-------------------|------------|-------------|-------|------------|-------------|
|                       | JF-DW         | Ca-Citrate    | Ca- Lactate   | JF-DW             | Ca-Citrate | Ca- Lactate | JF-DW | Ca-Citrate | Ca- Lactate |
| <i>C. tuberculata</i> | -16.6± 4 (a)  | -34.9± 5 (b)  | -29.6 ± 8 (b) | 2                 | 1          | 1.2         | 7.9   | 7.1        | 7.2         |
| <i>R. nomadica</i>    | -63.3 ± 9 (a) | -27.2 ± 3 (b) | -30.7 ± 9 (b) | 3.5               | 1          | 1           | 7.9   | 7          | 6           |
| <i>P. punctata</i>    | -47.2 ± 9 (a) | -24.3 ± 3 (b) | -22.7 ± 8 (b) | 1.2               | 0.5        | 1           | 7.9   | 6          | 6.8         |

**Table S9.** Comparison of the fatty acid composition of and *Rhopilema nomadica*, *Phyllorhiza punctata* and *Cotylorhiza tuberculata* JF samples washed with drinking water (JF-DW) and treated with brines containing calcium salts at 5 days treatment (Ca-Citrate: calcium citrate; Ca-Lactate: calcium lactate). Fatty acid composition data are expressed as percentage of the total fatty acids ± SD.

|                                             | Fatty acids composition (%) |                   |                   |                          |                   |                   |                             |                   |                   |
|---------------------------------------------|-----------------------------|-------------------|-------------------|--------------------------|-------------------|-------------------|-----------------------------|-------------------|-------------------|
|                                             | <i>R. nomadica</i> JF-DW    |                   |                   | <i>P. punctata</i> JF-DW |                   |                   | <i>C. tuberculata</i> JF-DW |                   |                   |
|                                             | JF-DW                       | Ca-Citrate        | Ca-Lactate        | JF-DW                    | Ca-Citrate        | Ca-Lactate        | JF-DW                       | Ca-Citrate        | Ca-Lactate        |
| <b>Saturated FA (SFA)</b>                   |                             |                   |                   |                          |                   |                   |                             |                   |                   |
| Myristic acid C <sub>14:0</sub>             | 6.6 ± 0.7                   | —                 | 9.2 ± 0.2         | 10.5 ± 1.1               | 8.4 ± 0.8         | 7.7 ± 0.8         | —                           | —                 | —                 |
| Pentadecanoic acid C <sub>15:0</sub>        | —                           | —                 | —                 | 2 ± 0.4                  | —                 | —                 | —                           | —                 | —                 |
| Palmitic acid C <sub>16:0</sub>             | 32.4 ± 4.0                  | 44.2 ± 4.5        | 38.8 ± 0.4        | 28.3 ± 3.0               | 20.9 ± 2.0        | 20.1 ± 2.0        | 44.7 ± 4.5                  | 43.2 ± 4.0        | 41.2 ± 3.3        |
| Margaric acid C <sub>17:0</sub>             | 2.6 ± 0.2                   | 1.6 ± 0.2         | —                 | 1.4 ± 0.2                | 2.5 ± 0.2         | 2.3 ± 0.2         | —                           | —                 | —                 |
| Stearic acid C <sub>18:0</sub>              | 26.0 ± 3.9                  | 37.6 ± 4.0        | 29.8 ± 2.8        | 15.2 ± 3.5               | 14.6 ± 1.5        | 14.2 ± 2.7        | 34.4 ± 4.0                  | 38.8 ± 3.8        | 35.2 ± 3.4        |
| Nonadecanoic acid C <sub>19:0</sub>         | —                           | —                 | —                 | —                        | —                 | —                 | —                           | 13.2 ± 1.3        | —                 |
| Arachidic acid C <sub>20:0</sub>            | 2.2 ± 0.2                   | 5.1 ± 0.5         | 1.4 ± 0.2         | —                        | 1.5 ± 0.2         | 1.2 ± 0.3         | —                           | —                 | 1.9 ± 0.2         |
| <b>Total SFA</b>                            | <b>69.8 ± 7.0</b>           | <b>88.5 ± 8.9</b> | <b>79.2 ± 8.0</b> | <b>57.3 ± 5.7</b>        | <b>48.0 ± 4.8</b> | <b>45.5 ± 4.5</b> | <b>79.1 ± 8.1</b>           | <b>95.2 ± 8.2</b> | <b>78.3 ± 7.8</b> |
| <b>Monounsaturated FA (MUFA)</b>            |                             |                   |                   |                          |                   |                   |                             |                   |                   |
| Palmitoleic acid C <sub>16:1</sub> (ω7)     | —                           | —                 | —                 | 5.0 ± 0.5                | 4.4 ± 0.5         | 4.0 ± 0.4         | —                           | —                 | —                 |
| Oleic acid C <sub>18:1</sub> (ω9)           | 3.1 ± 0.2                   | 3.3 ± 0.4         | 3.7 ± 0.4         | 4.3 ± 0.3                | 4.8 ± 0.5         | —                 | —                           | —                 | —                 |
| Isooleic acid C <sub>18:1</sub> trans-10    | 2.3 ± 0.4                   | —                 | 1.2 ± 0.1         | —                        | —                 | 6.7 ± 0.3         | —                           | —                 | 8.6 ± 0.9         |
| Vaccenic acid C <sub>18:1</sub> cis-11 (ω7) | —                           | —                 | —                 | 1.5 ± 0.2                | 2.2 ± 0.2         | —                 | —                           | —                 | —                 |

|                                                     |                   |                  |                   |                   |                   |                   |                   |                  |                   |
|-----------------------------------------------------|-------------------|------------------|-------------------|-------------------|-------------------|-------------------|-------------------|------------------|-------------------|
| <b>Total MUFA</b>                                   | <b>5.4 ± 0.5</b>  | <b>3.3 ± 0.4</b> | <b>4.9 ± 0.5</b>  | <b>10.8 ± 0.3</b> | <b>11.4 ± 0.7</b> | <b>10.7 ± 0.3</b> | <b>0</b>          | <b>0</b>         | <b>8.6 ± 0.9</b>  |
| <b>Polyunsaturated FA (PUFA)</b>                    |                   |                  |                   |                   |                   |                   |                   |                  |                   |
| <b>Linoleic acid C<sub>18:2</sub> (ω6)</b>          | 2.3 ± 0.3         | —                | 6.9 ± 0.7         | 4.8 ± 0.5         | 2.9 ± 0.3         | 2.8 ± 0.3         | —                 | —                | —                 |
| <b>Isolinoleic acid C<sub>18:2 trans 8,11</sub></b> | —                 | —                | —                 | —                 | —                 | —                 | —                 | —                | 11.1 ± 1.1        |
| <b>Linolenic acid C<sub>18:3</sub> (ω3)</b>         | 2.7 ± 0.4         | —                | —                 | 3.3 ± 0.3         | 4.2 ± 0.4         | 4.9 ± 0.5         | —                 | —                | —                 |
| <b>Stearidonic acid C<sub>18:4</sub> (ω3)</b>       | 2.0 ± 0.2         | —                | —                 | 3.8 ± 0.4         | 4.2 ± 0.4         | 4.0 ± 0.4         | 7.5 ± 0.8         | —                | —                 |
| <b>Eicosadienoic acid C<sub>20:2</sub> (ω6)</b>     | —                 | —                | —                 | —                 | —                 | 0.6 ± 0.2         | —                 | —                | —                 |
| <b>Arachidonic acid C<sub>20:4</sub> (ω6)</b>       | 7.4 ± 0.7         | 4.6 ± 0.5        | 5.0 ± 0.4         | 3.8 ± 0.4         | 7.9 ± 0.5         | 5.5 ± 0.6         | 4.4 ± 0.3         | 2.0 ± 0.1        | 2.0 ± 0.2         |
| <b>Eicosapentaenoic acid C<sub>20:5</sub> (ω3)</b>  | 5.6 ± 0.6         | 1.5 ± 0.2        | 1.0 ± 0.5         | 8.5 ± 0.6         | 9.5 ± 0.8         | 13.2 ± 1.0        | 4.1 ± 0.3         | 1.9 ± 0.2        | —                 |
| <b>Docosapentaenoic acid C<sub>22:5</sub> (ω3)</b>  | 0.9 ± 0.1         | —                | —                 | 0.9 ± 0.1         | 1.6 ± 0.1         | 1.8 ± 0.2         | —                 | —                | —                 |
| <b>Docosaheptaenoic acid C<sub>22:6</sub> (ω3)</b>  | 4.2 ± 0.4         | 2.1 ± 0.2        | 3.0 ± 0.3         | 6.8 ± 0.6         | 10.2 ± 0.2        | 10.9 ± 1.1        | 5.0 ± 0.5         | 0.9 ± 0.1        | —                 |
| <b>Total PUFA</b>                                   | <b>25.0 ± 2.6</b> | <b>8.2 ± 0.8</b> | <b>15.9 ± 1.3</b> | <b>34.6 ± 3.2</b> | <b>40.6 ± 4.1</b> | <b>43.8 ± 4.4</b> | <b>20.9 ± 0.8</b> | <b>4.8 ± 0.5</b> | <b>13.1 ± 1.3</b> |
| <b>Σω6</b>                                          | 9.6               | 4.6              | 11.9              | 8.6               | 10.8              | 9.0               | 4.4               | 2                | 2                 |
| <b>Σω3</b>                                          | 15.4              | 3.7              | 4.0               | 23.2              | 29.8              | 34.8              | 16.5              | 2.7              | -                 |
| <b>ω6/ω3</b>                                        | 0.6               | 1.2              | 3.0               | 0.4               | 0.4               | 0.3               | 0.3               | 0.7              | -                 |
| <b>Total Lipids (%DW)</b>                           | 26.5              | 72.0             | 68.6              | 83.8              | 56.5              | 72.4              | 29.0              | 12.5             | 4.0               |
